# Supplementary material for: 日常生活場面に表出する人間攻撃性(VI):神経質傾向との構造的関連
Source: MDPI journal article supplement (doi:10.3390/nu15153439), 1998-01-01
Supplement: s1 [file s1]

**Supplementary Table S1. Baseline characteristics of participants according to decile of albumin-corrected calcium concentrations**

| Characteristics                                                         | Albumin-corrected calcium concentrations (mmol/L) |                         |                                 |                              |
|-------------------------------------------------------------------------|---------------------------------------------------|-------------------------|---------------------------------|------------------------------|
|                                                                         | Total                                             | Decile 1<br>( $<2.28$ ) | Decile 5<br>( $2.35$ - $2.37$ ) | Decile 10<br>( $\geq 2.48$ ) |
| <b>N</b>                                                                | 386 844                                           | 38 684                  | 38 686                          | 38 685                       |
| <b>Age, mean (SD), y</b>                                                | 56.48 (8.1)                                       | 54.81 (8.5)             | 56.23 (8.1)                     | 58.55 (7.4)                  |
| <b>Follow-up time, mean (SD), y</b>                                     | 11.75 (2.2)                                       | 11.86 (2.1)             | 11.79 (2.1)                     | 11.58 (2.2)                  |
| <b>Female, No. (%)</b>                                                  | 209 724(54.2)                                     | 17 048 (44.1)           | 20 216 (52.3)                   | 26 868 (69.5)                |
| <b>White race</b>                                                       | 365 358 (94.5)                                    | 36 327 (94.0)           | 36 646 (94.8)                   | 36 278 (93.9)                |
| <b>College or university degree, No. (%)</b>                            | 127 174 (32.9)                                    | 14 899 (38.6)           | 12 971 (33.6)                   | 10 595 (27.4)                |
| <b>Fasting before blood draw, No. (%)</b>                               | 15 471 (4.0)                                      | 2 047 (5.30)            | 1 512 (3.9)                     | 1 315 (3.4)                  |
| <b>Townsend index, mean (SD), y</b>                                     | -1.39 (3.0)                                       | -1.29 (3.1)             | -1.42 (3.0)                     | -1.34 (3.0)                  |
| <b>Smoking status, No. (%)<sup>a</sup></b>                              |                                                   |                         |                                 |                              |
| <b>Never</b>                                                            | 216 063 (55.9)                                    | 22 127 (57.3)           | 21 550 (55.8)                   | 21 351 (55.3)                |
| <b>Previous</b>                                                         | 133 061 (34.4)                                    | 12 969 (33.6)           | 13 423 (34.7)                   | 13 471 (34.9)                |
| <b>Current, pack-years <math>&lt;10</math></b>                          | 4811 (1.2)                                        | 507 (1.3)               | 517 (1.3)                       | 396 (1.0)                    |
| <b>Current, pack-years <math>\geq 10</math> and <math>&lt;20</math></b> | 6799 (1.8)                                        | 644 (1.7)               | 663 (1.7)                       | 725 (1.9)                    |
| <b>Current, pack-years <math>\geq 20</math> and <math>&lt;30</math></b> | 6264 (1.6)                                        | 550 (1.4)               | 635 (1.6)                       | 680 (1.8)                    |
| <b>Current, pack-years <math>\geq 30</math></b>                         | 9853 (2.6)                                        | 776 (2.0)               | 939 (2.4)                       | 1144 (3.0)                   |
| <b>Passive smoking, No. (%)<sup>a</sup></b>                             |                                                   |                         |                                 |                              |
| <b>Never</b>                                                            | 257 510 (71.4)                                    | 26 016 (71.7)           | 25 808 (71.4)                   | 25 244 (70.4)                |
| <b><math>&lt;20</math> hours a week</b>                                 | 69 187 (19.2)                                     | 7 135 (19.7)            | 7 004 (19.4)                    | 6 758 (18.8)                 |
| <b><math>\geq 20</math> hours a week</b>                                | 4 229 (1.2)                                       | 429 (1.2)               | 428 (1.2)                       | 392 (1.1)                    |
| <b>PM<sub>2.5</sub>, mean (SD), <math>\mu\text{g}/\text{m}^3</math></b> | 9.97 (1.1)                                        | 10.01 (1.7)             | 9.93 (1.0)                      | 9.88 (1.0)                   |
| <b>Alcohol intake frequency, No. (%)<sup>a</sup></b>                    |                                                   |                         |                                 |                              |
| <b>Never or special occasions only</b>                                  | 73 738 (19.1)                                     | 6 741 (17.5)            | 7 111 (18.4)                    | 9 199 (23.8)                 |
| <b>Once a month to twice a week</b>                                     | 143 781 (37.2)                                    | 14 240 (36.9)           | 14 293 (37.0)                   | 14 479 (37.5)                |
| <b>Three times a week to daily</b>                                      | 168 518 (43.6)                                    | 17 595 (45.5)           | 17 218 (44.5)                   | 14 923 (38.6)                |
| <b>Body mass index, mean (SD), <math>\text{kg}/\text{m}^2</math></b>    | 27.50 (4.8)                                       | 27.20 (4.7)             | 27.45 (4.7)                     | 27.95 (5.0)                  |
| <b>eGFR, <math>\text{mL}/\text{min}/1.73 \text{ m}^2</math></b>         | 90.89 (13.4)                                      | 93.76 (13.5)            | 91.26 (13.00)                   | 87.51 (14.1)                 |
| <b>25(OH)D, <math>\text{nmol}/\text{L}</math></b>                       | 48.72 (21.0)                                      | 45.43 (20.6)            | 48.55 (20.9)                    | 50.83 (21.2)                 |
| <b>Physical activity, mean (SD), MET-hour/week</b>                      | 15.55 (20.4)                                      | 14.95 (20.1)            | 15.65 (20.6)                    | 15.81 (20.5)                 |
| <b>Family history of respiratory disease, No. (%)</b>                   | 57 328 (14.8)                                     | 5 302 (13.7)            | 5 772 (14.9)                    | 6 341 (16.4)                 |
| <b>Prevalent Asthma, No. (%)</b>                                        | 39 142 (10.1)                                     | 3 925 (10.2)            | 3 911 (10.1)                    | 4 032 (10.4)                 |
| <b>Occupations associated with COPD, No. (%)</b>                        | 7 259 (1.9)                                       | 723 (1.9)               | 709 (1.8)                       | 783 (2.0)                    |

<sup>a</sup>: The percentage of the categorical variables does not sum to 100% because some participants chose to "not answer"

Abbreviations: MET, metabolic equivalent; PM<sub>2.5</sub>, fine particulate matter; eGFR, estimated glomerular filtration rate; 25(OH)D, 25-hydroxyvitamin D; COPD, chronic obstructive pulmonary disease;

**Supplementary Table S2. Sensitivity analyses for the associations between albumin-corrected calcium and the risk of COPD incidence**

| Model                                                                         | Reference interval for UK Biobank population (mmol/L) |                    |                       |                    | HR per 1-SD increment <sup>b</sup> |
|-------------------------------------------------------------------------------|-------------------------------------------------------|--------------------|-----------------------|--------------------|------------------------------------|
|                                                                               | Hypocalcemia (<2.19)                                  | Normal (2.19-2.56) | Hypercalcemia (>2.56) | <i>P</i> for trend |                                    |
| The primary findings for the total cohort                                     |                                                       |                    |                       |                    |                                    |
| No. of COPD/person-years                                                      | 59/26 723                                             | 10 188/4 419 880   | 335/99 983            |                    |                                    |
| Fully-adjusted model <sup>a</sup>                                             | 1.07 (0.83-1.39)                                      | ref                | 1.14 (1.02-1.27)      | 0.020              | 1.02 (1.00-1.04)                   |
| Excluding incident COPD cases within the first two years of follow-up (n=789) |                                                       |                    |                       |                    |                                    |
| No. of COPD/person-years                                                      | 51/26 714                                             | 9 427/4 419 038    | 315/99 964            |                    |                                    |
| Fully-adjusted model <sup>a</sup>                                             | 1.01 (0.77-1.34)                                      | ref                | 1.16 (1.04-1.30)      | 0.008              | 1.03 (1.01-1.05)                   |
| Excluding participants with poor self-rated health (n=15 248)                 |                                                       |                    |                       |                    |                                    |
| No. of COPD/person-years                                                      | 51/25 476                                             | 8 656/4 261 861    | 278/95 302            |                    |                                    |
| Fully-adjusted model <sup>a</sup>                                             | 1.14 (0.87-1.51)                                      | ref                | 1.12 (0.99-1.26)      | 0.031              | 1.02 (1.00-1.05)                   |
| Adjustment for additional female-specific factors <sup>c</sup>                |                                                       |                    |                       |                    |                                    |
| No. of COPD/person-years                                                      | 59/26 723                                             | 10 188/4 419 880   | 335/99 983            |                    |                                    |
| Fully-adjusted model <sup>a</sup>                                             | 1.08 (0.83-1.39)                                      | ref                | 1.14 (1.02-1.27)      | 0.020              | 1.02 (1.00-1.04)                   |

<sup>a</sup>: Fully-adjusted model: adjusted for age, sex, ethnicity, assessment centres, fasting status, college or university degree, body mass index, smoking status and pack-years, alcohol drinking, summed metabolic equivalent of task-minutes per week for activity, family history of respiratory diseases, prevalent asthma, estimated glomerular filtration rate (eGFR), 25(OH)D, passive smoking, PM<sub>2.5</sub>, occupations associated with COPD.

<sup>b</sup>: The SD was 0.082 mmol/L for albumin-adjusted serum calcium.

<sup>c</sup>: Additional adjustments for female-specific factors included menopause status (no, yes, unknown) and hormone replacement therapy (no, yes, unknown).

Abbreviations: HR, hazard ratio; CI, confidence interval; ref, reference.

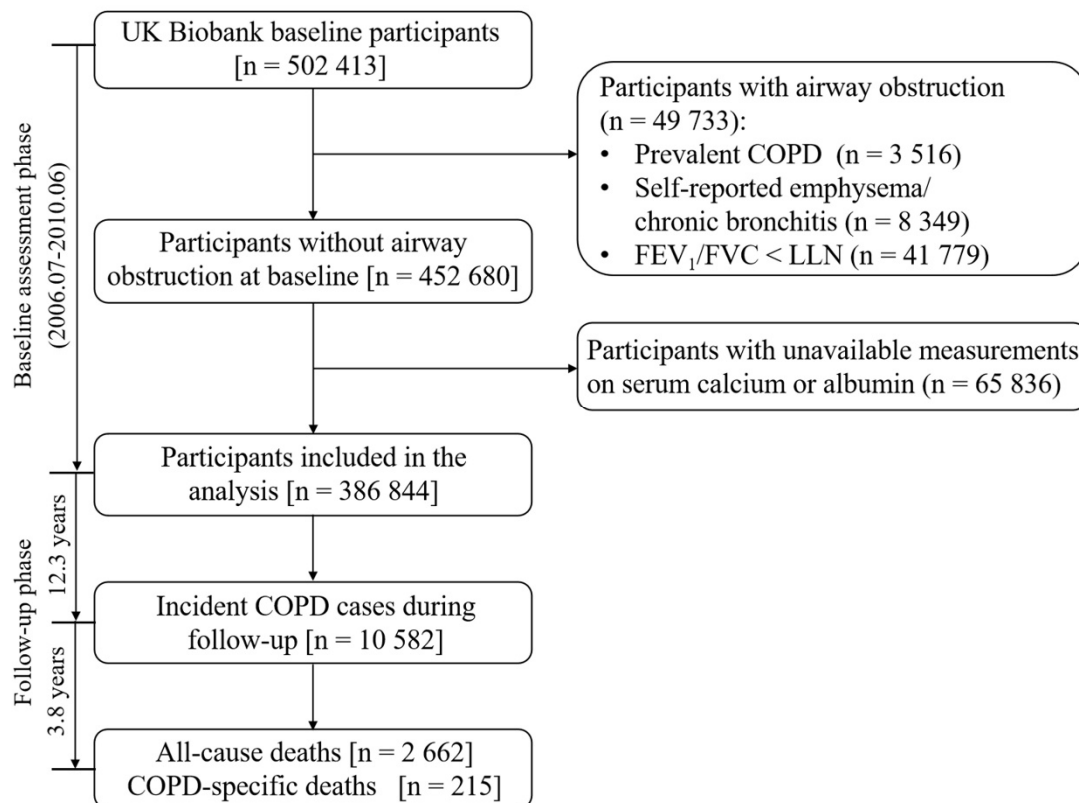

**Supplementary Figure S1. Flow chart of study participants.**

Abbreviations: COPD = chronic obstructive pulmonary disease; FEV<sub>1</sub> = forced expiratory volume in the first second; FVC = forced vital capacity; LLN = lower limit of normal.

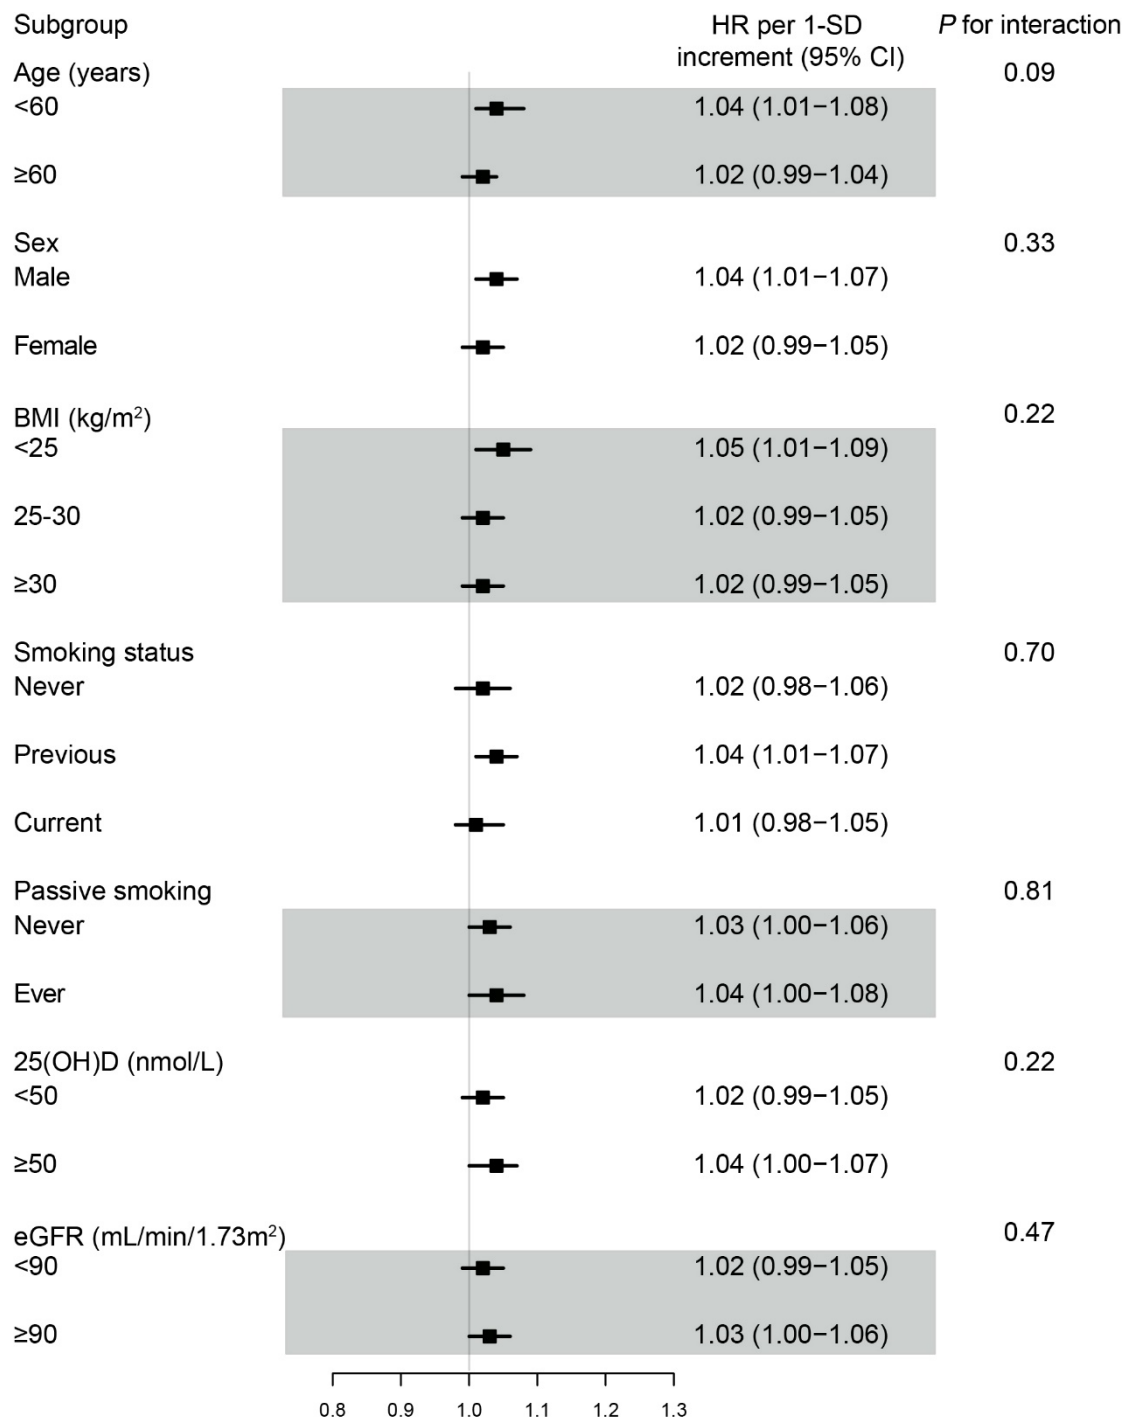

**Supplementary Figure S2. Forest plots of stratified analysis of the association between albumin-corrected calcium concentrations and risk of COPD incidence.**

Abbreviations: COPD, chronic obstructive pulmonary disease; BMI, body mass index; 25(OH)D, 25-hydroxyvitamin D; eGFR, estimated glomerular filtration rate; HR, hazard ratio; CI, confidence interval.

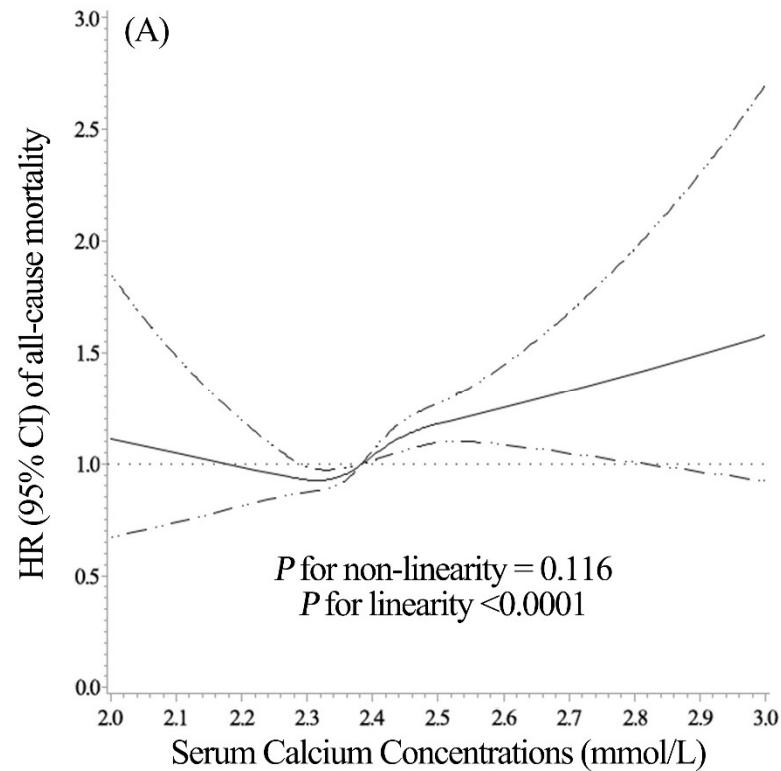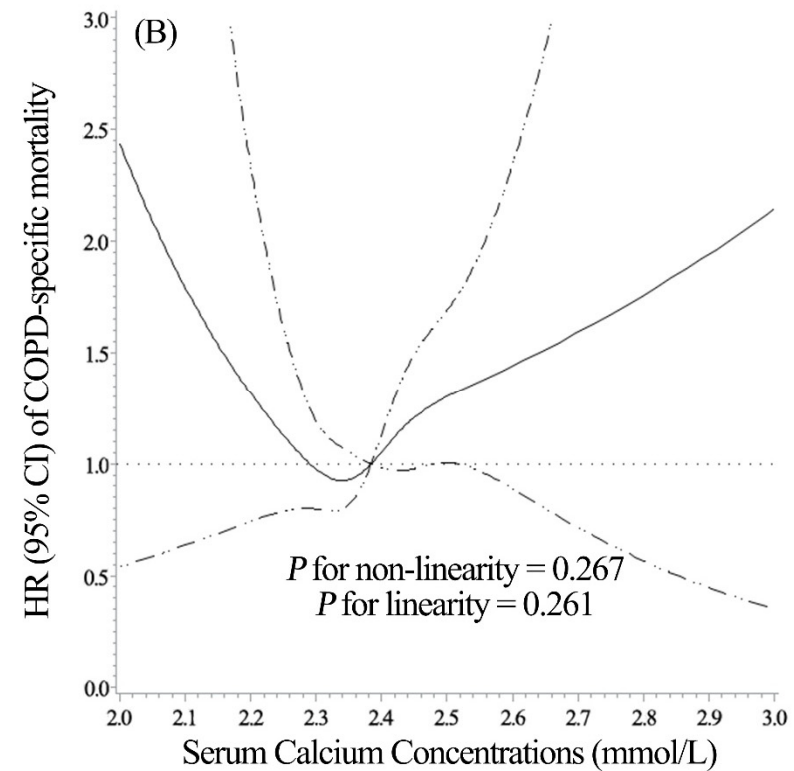

**Supplementary Figure S3. Dose-response relationships between albumin-corrected calcium concentrations and the risk of all-cause (A) and COPD-specific (B) mortality in COPD cases.** The associations were examined by multivariate cox regression models based on restricted cubic splines. Median serum calcium concentration as a reference. The solid line represents estimates of hazard ratios and the dashed lines represent 95% confidence intervals.
